# Supplementary material for: DNA double-strand breaks induce H2Ax phosphorylation domains in a contact-dependent manner
Source: PubMed Central journal article supplement (PMC7308414; doi:10.1038/s41467-020-16926-x), 2020-06-22
Supplement: 41467_2020_16926_MOESM1_ESM.pdf [file 41467_2020_16926_MOESM1_ESM.pdf]

**Supplementary Information**

“DNA Double-Strand Breaks Induce H2Ax Phosphorylation Domains in a Contact-Dependent Manner”

Collins et al.

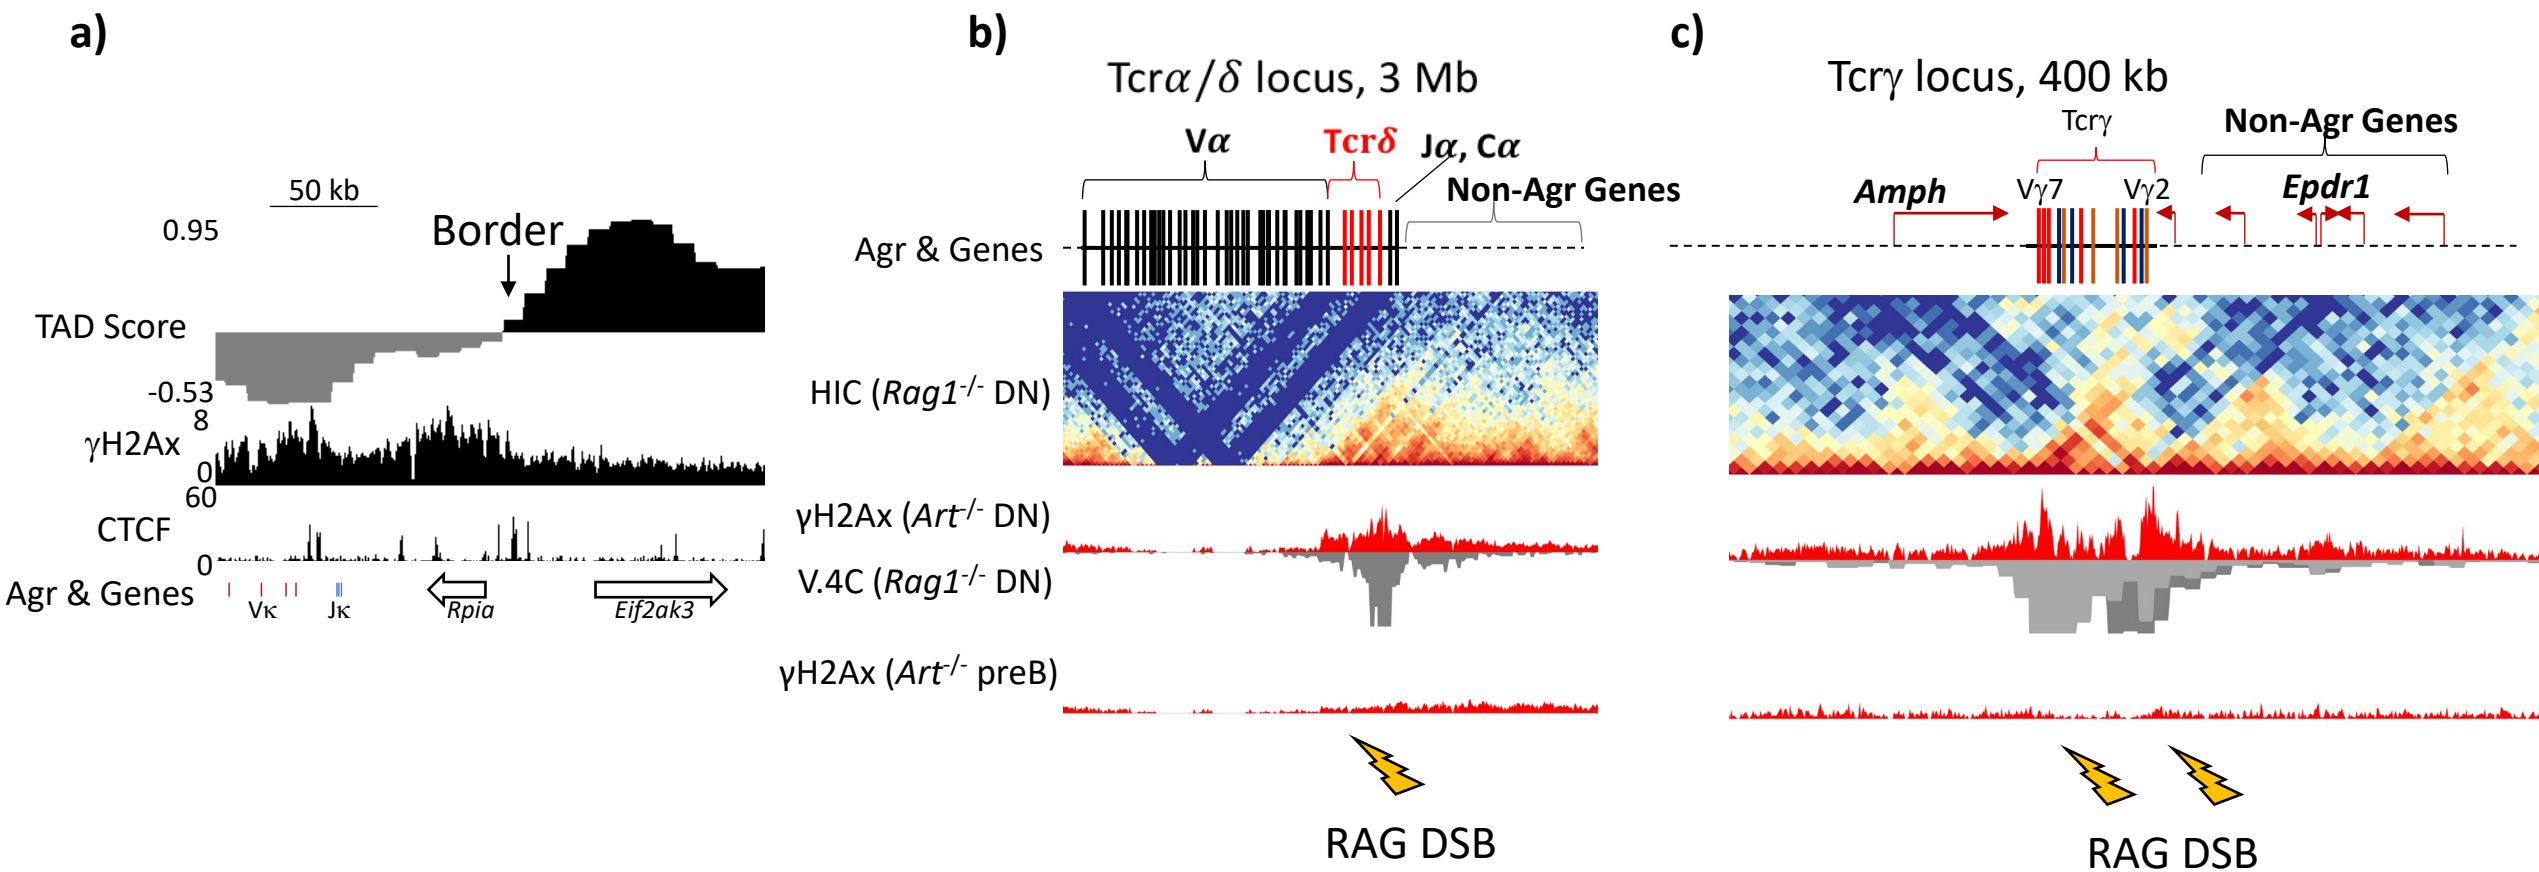

**Supplementary Figure 1: Supplemental data related to Figure 1.**

**A)** UCSC genome browser snapshot showing the 3' *Igk* TAD border. Data are derived from *Lig4*<sup>-/-</sup> G1-arrested v-abl pre-B cells following Imatinib treatment (72h). Tracks show RPKM-normalized histograms for  $\gamma$ H2Ax CHIP-seq (RPKM mean of three independent replicates), CTCF Cut and Run-seq (n=1), and relative TAD insulation scores, derived from 40 kb bins (blue lines) or 20-100 kb bins (grey lines). The *Igk* TAD border position is indicated above. **(B-C)** HiCExplorer PlotTADs representation of **(B)** *Tcrad* and **(C)** *Tcr $\gamma$*  Hi-C contacts (n=2, merged independent replicates),  $\gamma$ H2Ax CR-seq (Red, RPKM, representative of 2 independent replicates), and V.4C data (grey, interaction counts, n=2, merged independent replicates), from the indicated cell types. Each panel includes diagrams indicating antigen receptor loci, and genes on top, and the DSB location (lightning bolt) at the bottom. For *Tcr $\gamma$* , the two most commonly rearranged V segments were used as V.4C viewpoints (grey and dark grey).

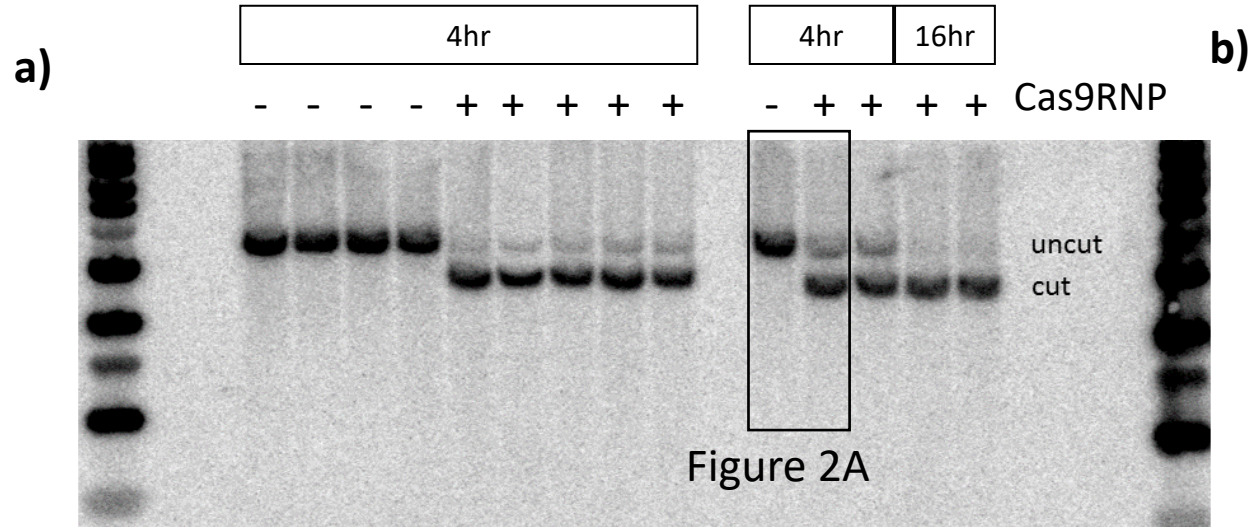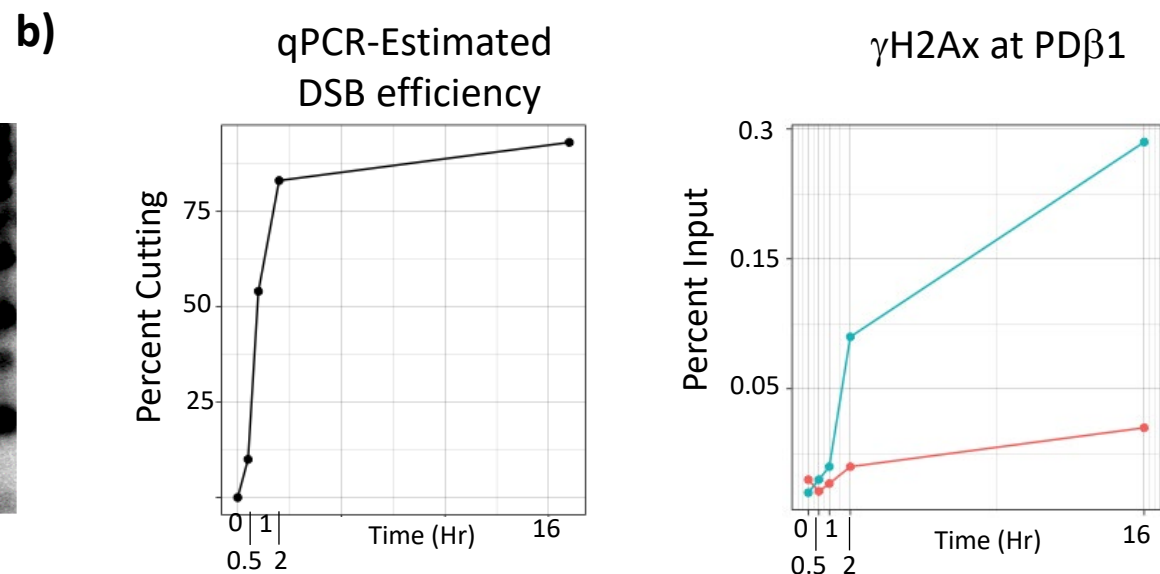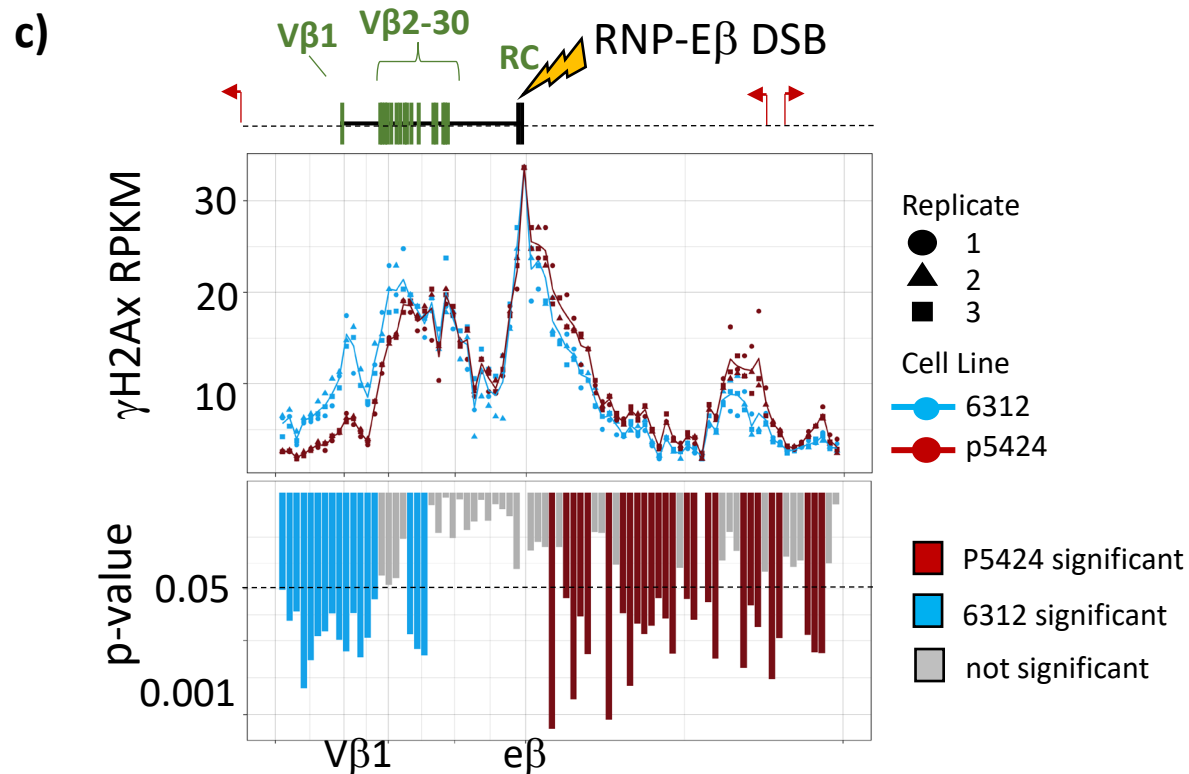

**Supplementary Figure 2: Supplemental data related to Figure 2.**

**A)** Southern blotting analysis, as described in Figure 2. Data are shown for independent replicates, as well as for an extended, 16-hour time point. Black box indicates a cropped section used for figure 2A. **B) Left:** Proportion of cut alleles as a function of time post-nucleofection was calculated by relative qPCR. For this assay, any negative value is shown as 0% cutting. **Right:** G1-arrested *Lig4*<sup>-/-</sup> v-abl cells were nucleofected with RNP-e $\beta$  (blue) or an RNP for a control genomic region on a separate chromosome (red) and processed for  $\gamma$ H2Ax ChIP-qPCR using oligos targeting PD $\beta$ 1. Relative  $\gamma$ H2Ax abundance was calculated using percent input. **C)** Dot and line plot showing  $\gamma$ H2Ax in 25 kb bins across *Tcrb*, two hours after pro- (63-12: blue) or pre- (p5424: red) lymphocyte cell lines were nucleofected with an RNP-E $\beta$ . Dots show three independent replicates while lines indicate mean  $\gamma$ H2Ax values. The locations of gene segments, regulatory elements and RNP target (lightning bolt) are shown at the top. Statistical significance and P values (Student's Paired T test) for each 25 kb bin is shown on bottom (blue significantly enriched in 6312, red significantly enriched in p5424).

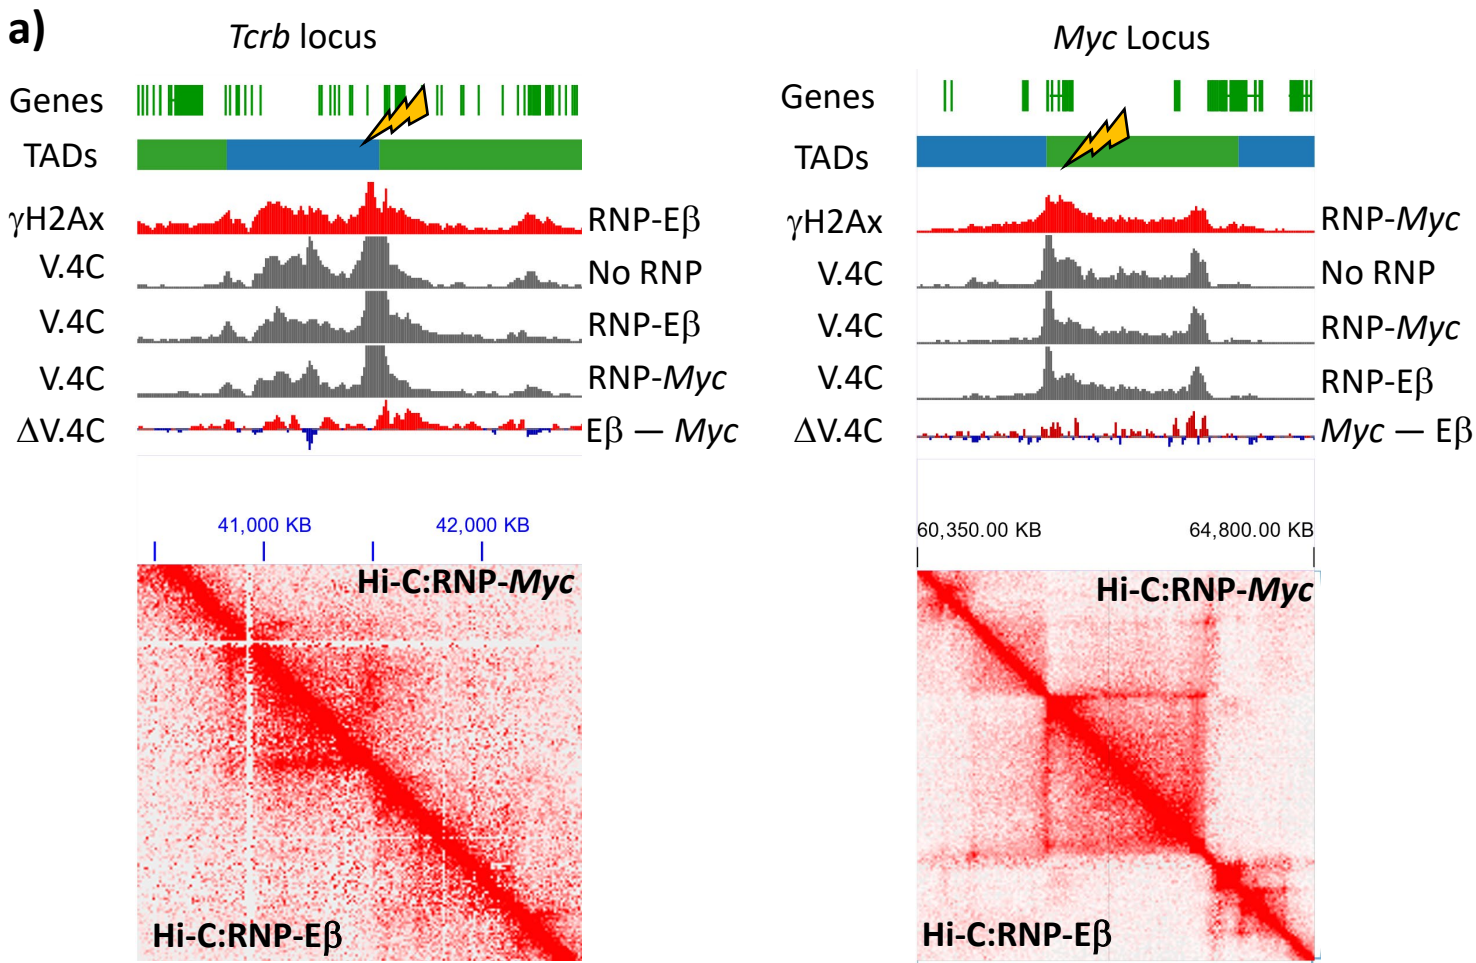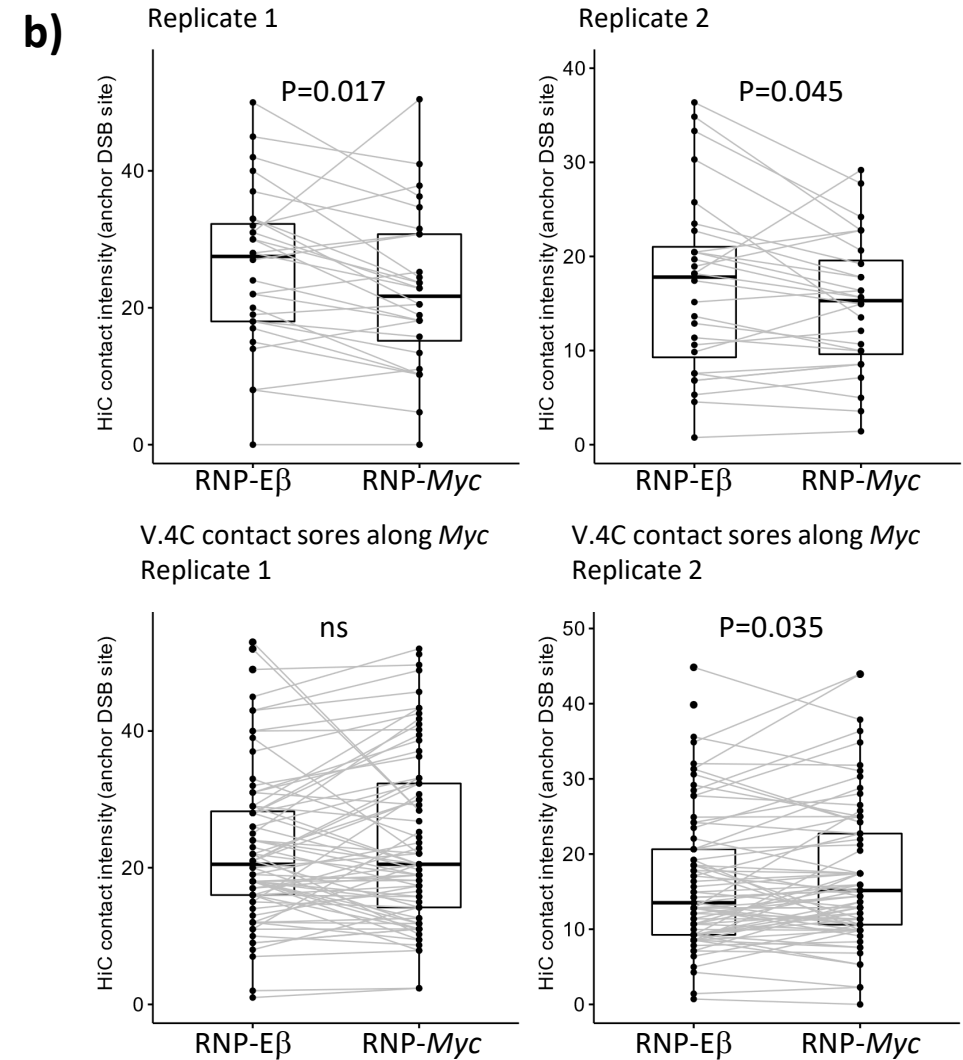

**Supplementary Figure 3: Supplemental data related to Figure 2.**

**A)** Juicebox browser snapshots showing the (left) *Tcrb* or (right) *Myc* loci in cells nucleofected with the indicated RNP complexes, or control cells that were not nucleofected. Locations of genes, gene segments, and TAD locations are shown at the top of each panel. RNP target locations and V.4C data extraction viewpoints are shown as lightning bolts. Tracks represent values for  $\gamma$ H2Ax CR-seq (Red, RPKM, representative of three independent experiments) or V.4C (Grey, representative of two independent experiments). Subtraction plots show differences in mean V.4C signal from cells receiving RNP-E $\beta$  versus RNP-Myc. Bottom: JuiceBox Hi-C plots after coverage-normalization, derived from G1-arrested *Lig4*<sup>-/-</sup> v-abl cells receiving RNPs targeted to *Myc* (top right) or E $\beta$  (bottom left). **B)** *Myc* promoter or E $\beta$  interactome derived from Hi-C data of cells two hours after RNP-E $\beta$  or RNP-Myc nucleofection, quantified in 25 kb bins across the targeted TAD. Relative interactome measurements have been normalized using coverage normalization and down sampling. For all plots, statistical enrichment (two-sided Paired Student's T test) is shown above. Means, quartiles, and outlier limits (1.5 x interquartile range) are indicated by the median line, box and whiskers, respectively. Grey lines indicate paired bins. Genomic intervals with over 50 interaction counts, which correspond to nearest neighbors, are not shown.

a)

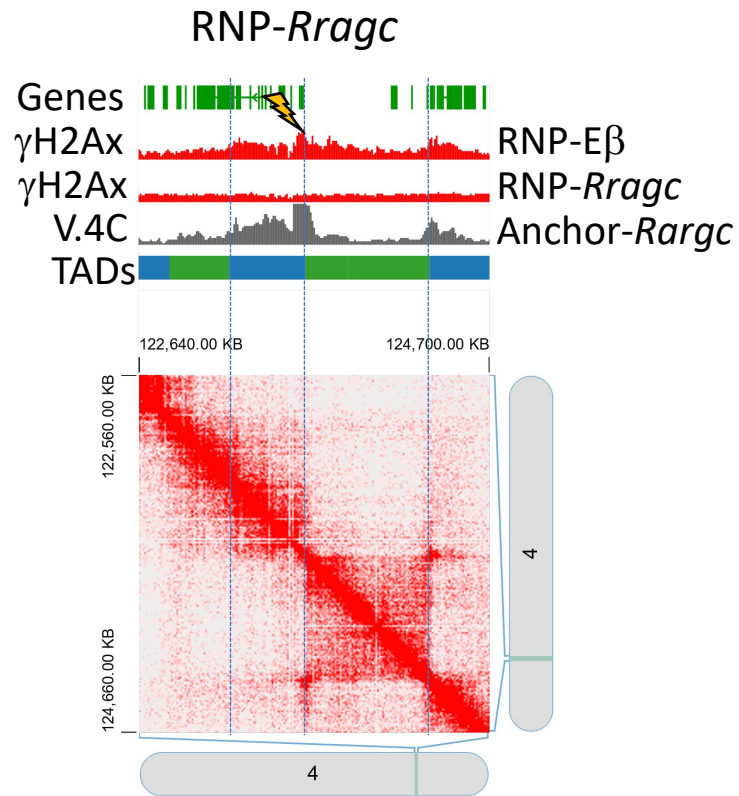

b)

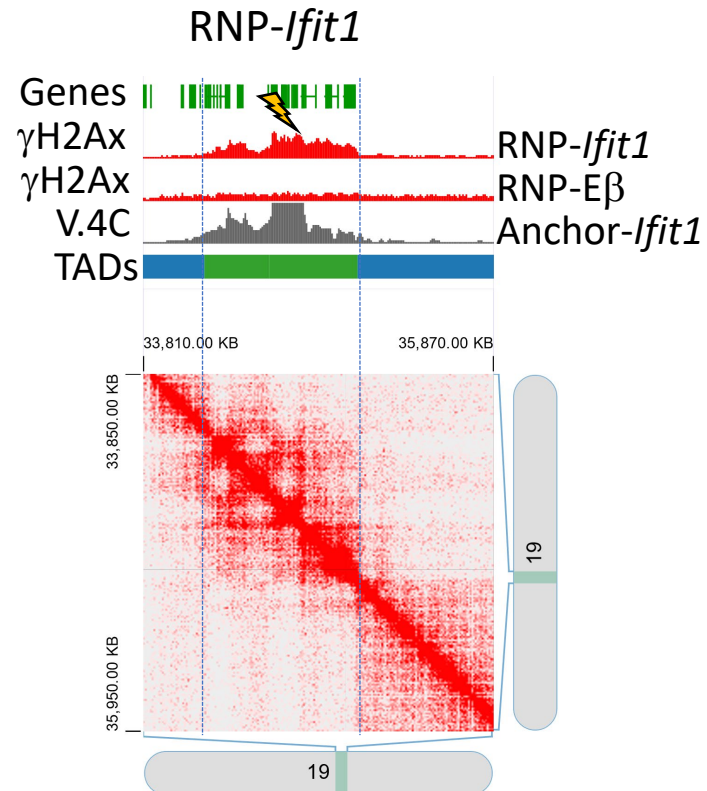

c)

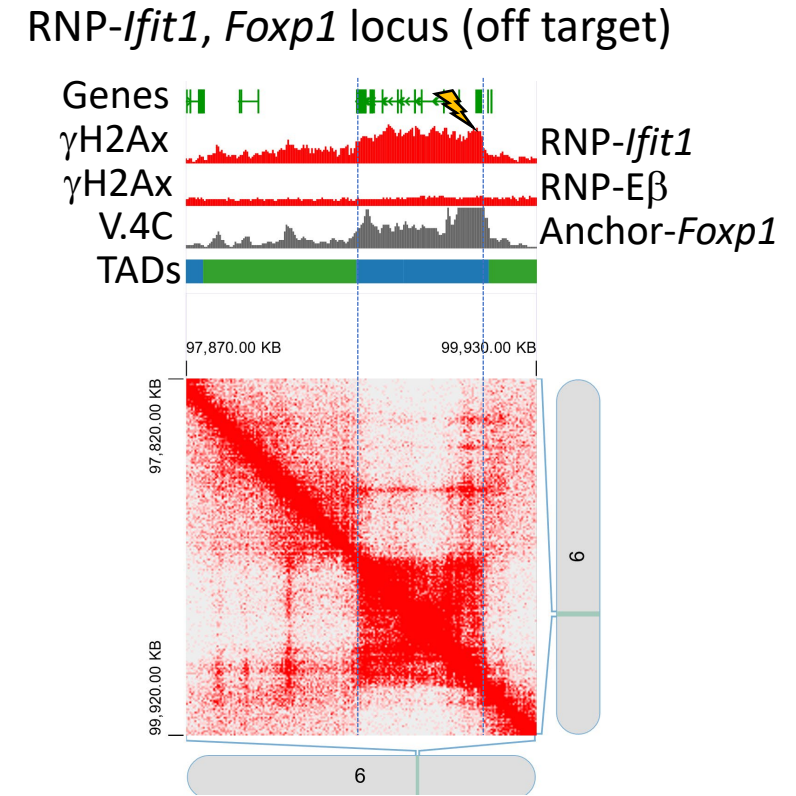

**Supplementary Figure 4: Supplemental data related to Figure 3.**

Juicebox browser snapshots showing the *Rragc* (A), *Ifit1* (B), or *Foxp1* (C) loci nucleofected with the indicated RNP complexes, or a control RNP targeted to E $\beta$  (Representative of 2 independent replicates, each). Data are represented as in Figure 3.

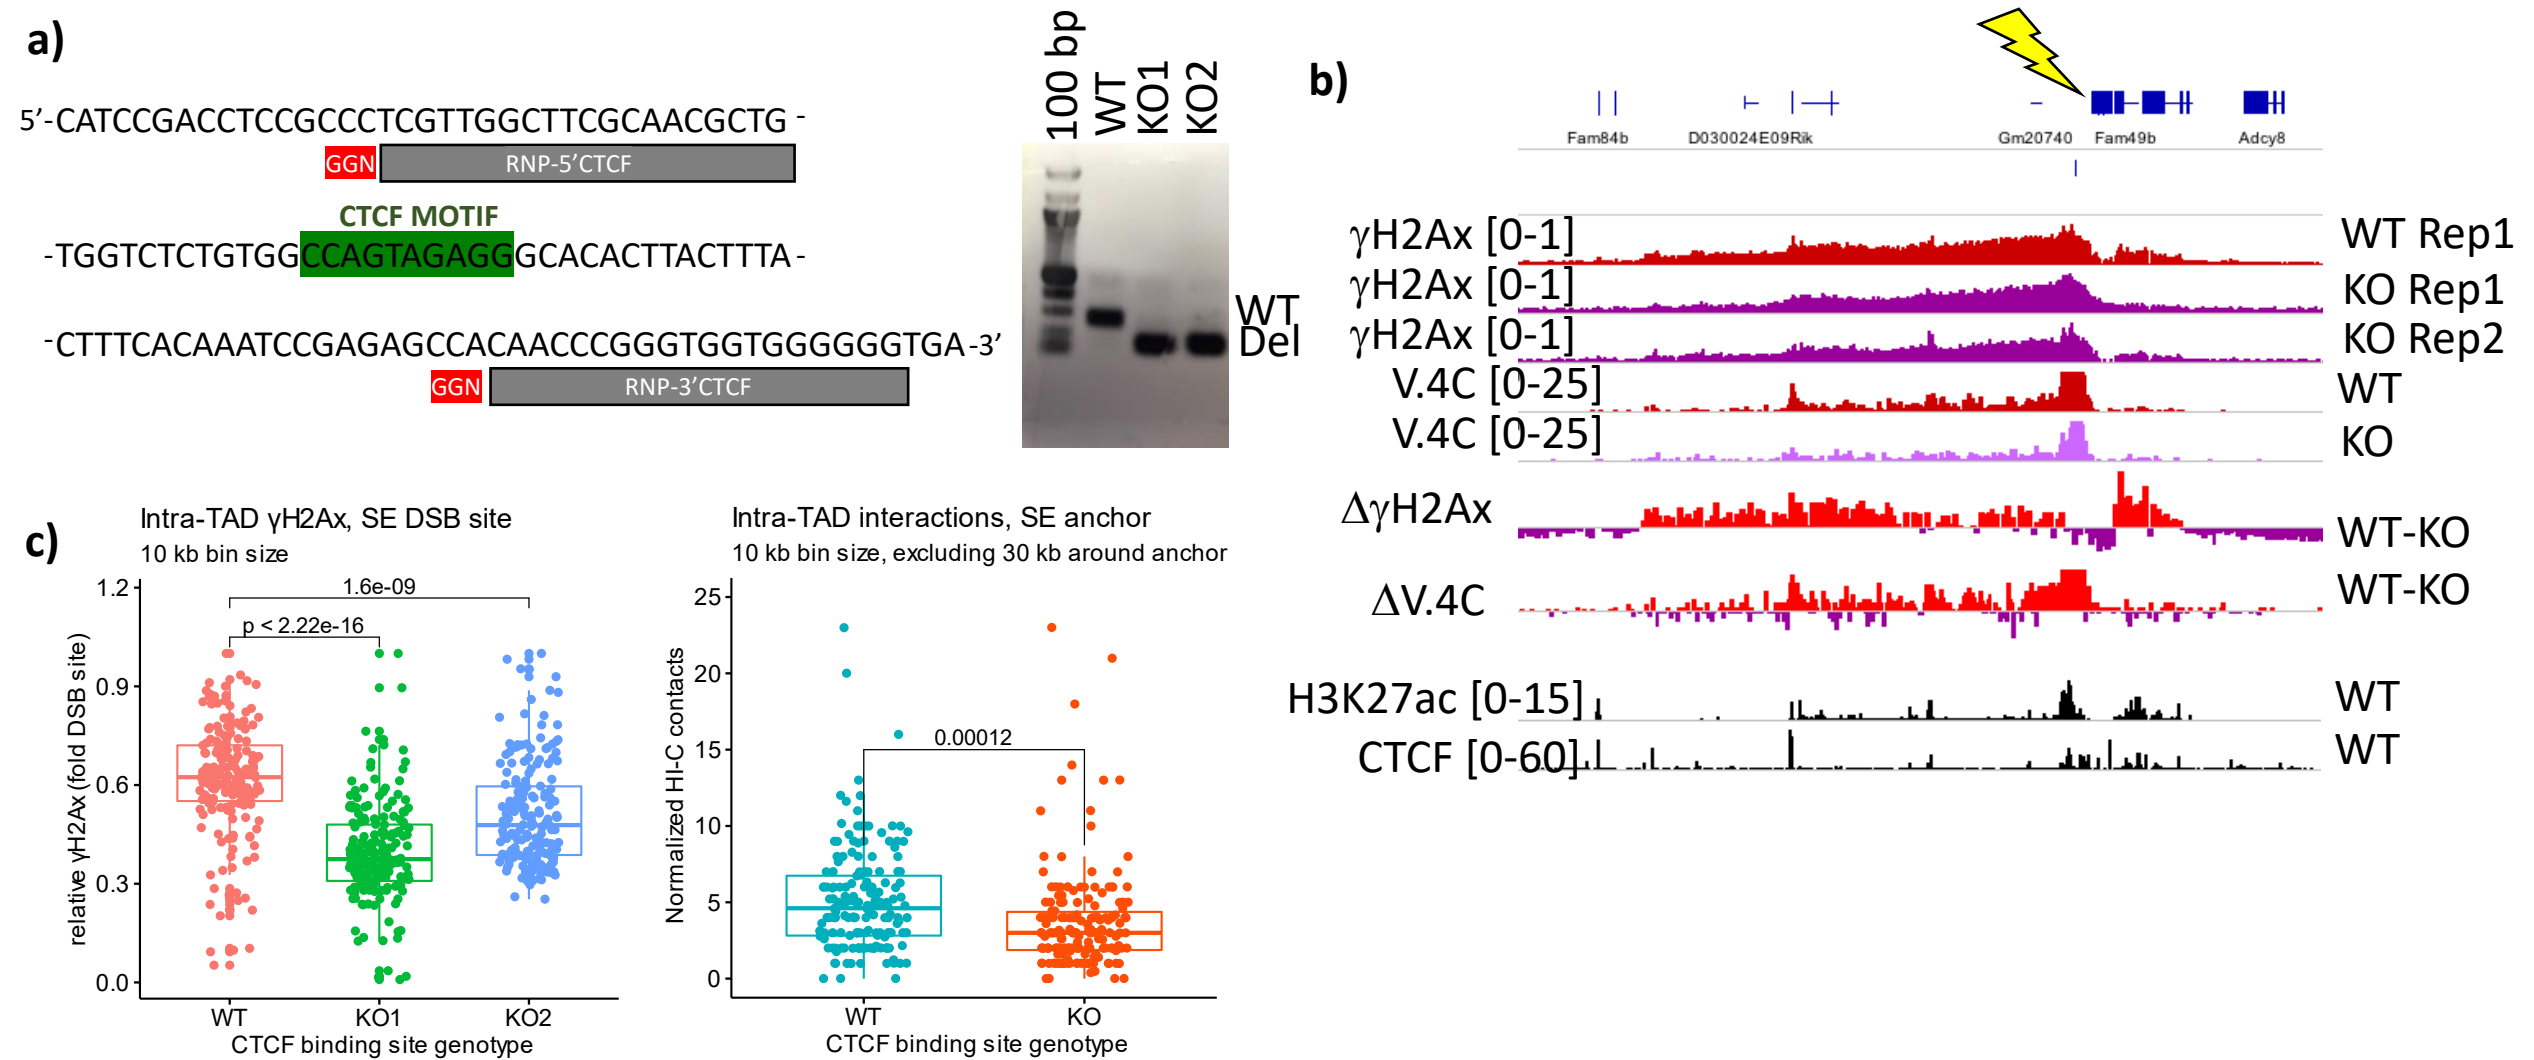

**Supplementary Figure 5: Supplemental data related to Figure 4**

**A)** Left: Genomic sequence of the upstream *Myc* CTCF site with RNP target sites (grey with red NGG) and CTCF motif (green) labeled. RNPs labeled 5' and 3' CTCF were used for subclone creation. Right: PCR showing deletion of the upstream *Myc* CTCF site. Gel image is representative of at least two independent genotyping PCRs. **B)** IGV snapshot, as described in Figure 4, showing the *Myc* locus in 63-12 cells with and without the 5' CTCF binding motif. Tracks representing  $\gamma$ H2Ax data were normalized to the DSB-containing bin. For subtraction plots of  $\gamma$ H2Ax or V.4C data, red represents WT enrichment, while purple represents KO enrichment. Independent replicates are indicated on the figure. RPKM-normalized CTCF and H3K27ac CR-seq tracks are shown on the bottom (n=1, each). **C)** *Myc* super-enhancer interactome and  $\gamma$ H2Ax derived from 5'CTCF WT or KO cell lines, quantified in 10 kb bins across the *Myc*-containing TAD. Left:  $\gamma$ H2Ax two hours after 5'CTCF WT or KO cells were nucleofected with RNP *Myc*-SE. Each  $\gamma$ H2Ax dataset was first normalized to RPKM values at the DSB-containing bin. Replicates are indicated on the figure. Right: Comparison of *Myc* promoter interactomes, derived from Hi-C data, across the *Myc*-containing TAD of indicated genotypes, without RNP nucleofection. Relative interactome measurements have been normalized using coverage normalization. For all plots, statistical enrichment (two-sided Paired Student's T test) is shown above. Means, quartiles, and outlier limits (1.5 x interquartile range) are indicated by the median line, box and whiskers, respectively.

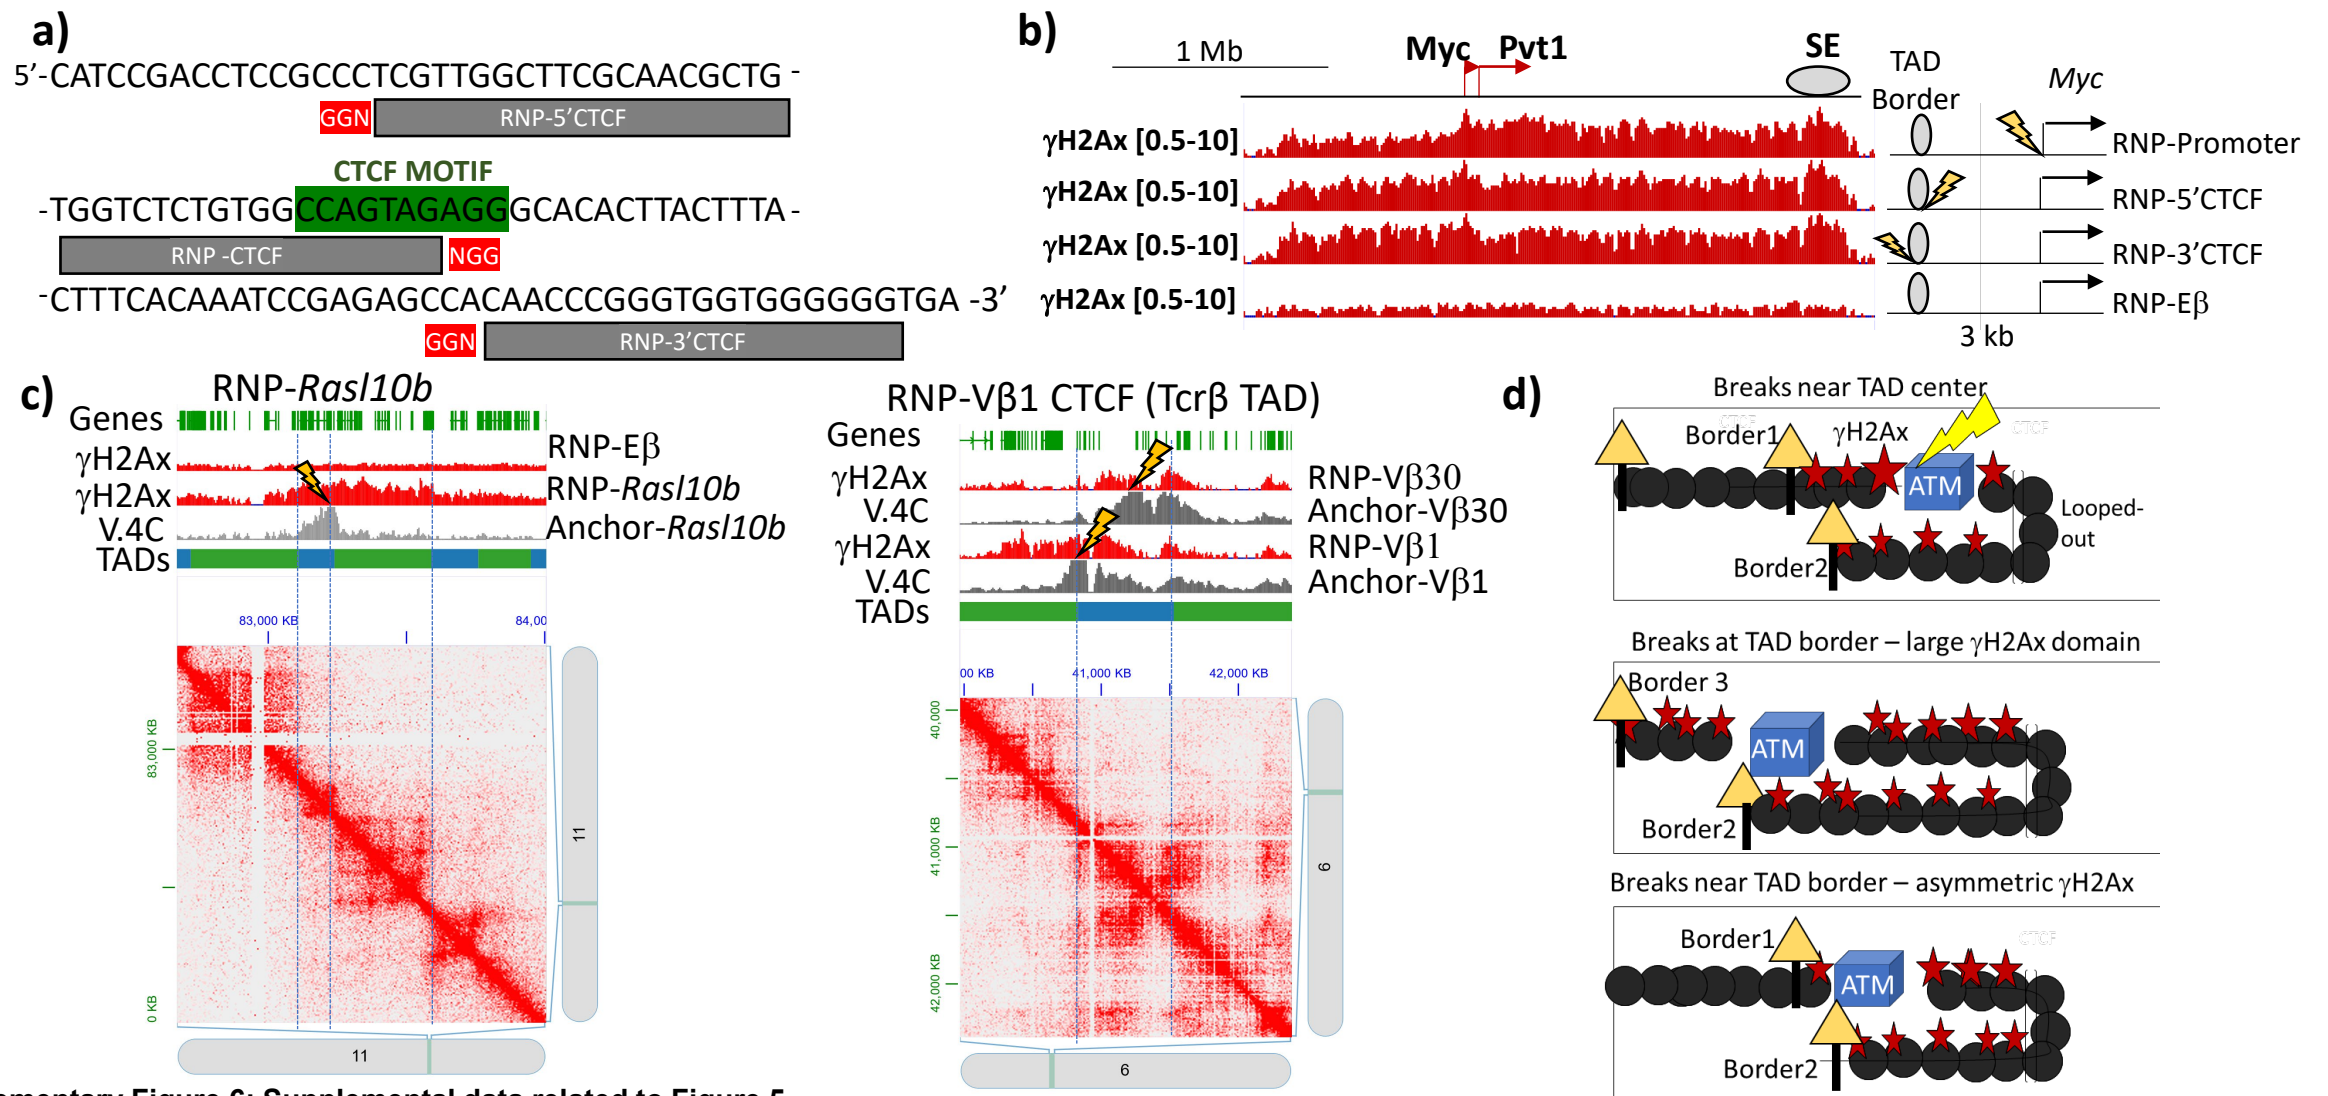

**Supplementary Figure 6: Supplemental data related to Figure 5**

**A)** Genomic sequence of the upstream *Myc* CTCF site with RNP target sites (grey with red NGG) and CTCF motif (green) labeled. RNPs labeled 5' and 3' CTCF were used for RNP targeting in Supplementary Figure 6, while RNP labeled CTCF was used for Figure 5. **B)**  $\gamma$ H2Ax following DSBs targeted to the TAD border. UCSC snapshot show values for  $\gamma$ H2Ax CR-seq (red, RPKM, representative of two independent experiments). Cartoons to the right of tracks show relative regulatory element and DSB sites (lightning bolts). **C)** Juicebox browser snapshots showing the *Ras10b* and *Tcrb* loci, nucleofected with the indicated RNP complexes or a control RNP targeted to e $\beta$ . Top: Scale bar, and gene locations (green). Middle: Tracks represent mean  $\gamma$ H2Ax CR-seq (red, scaled as min-max, representative of 2 independent replicates) and V.4C (grey, scaled as 0-50 interaction score, n=2 merged independent replicates). RNP target sites and V.4C anchors are shown as dashed blue lines. Bottom: JuiceBox Hi-C plots showing coverage normalized interaction scores. Relevant TADs are highlighted with dashed boxes. **D)** Model of  $\gamma$ H2Ax domain formation via chromosomal contacts. Top: Intra-TAD DSBs lead to propagation of  $\gamma$ H2Ax via contacts with the break site; Middle: DSB at a TAD border leads to spreading of  $\gamma$ H2Ax throughout both adjacent TADs; and, Bottom: DSBs near a TAD border generate highly asymmetric  $\gamma$ H2Ax domains on each side of the break, where spreading on one side is blocked by the proximal CTCF site.

**Supplementary Table 1**

Key resources table listing the reagents and datasets used in this study

| REAGENT or RESOURCE                                             | SOURCE                | IDENTIFIER                   |
|-----------------------------------------------------------------|-----------------------|------------------------------|
| <b>Antibodies</b>                                               |                       |                              |
| Anti-H2Ax (3 µg/ChIP)                                           | Abcam                 | Ab11175                      |
| Anti-phosphoH2Ax (3 µg/ChIP or 1 µg/Cut and Run)                | Millipore             | 05-636                       |
| Anti-CTCF (1 µg/Cut and Run)                                    | Rockland              | 600-401-C42                  |
| Anti-H3K27Ac (1 µg/Cut and Run)                                 | Abcam                 | Ab4722                       |
| Rabbit anti Mouse (1 µg/Cut and Run)                            | Invitrogen            | 31188                        |
| <b>Chemicals, Peptides, and Recombinant Proteins</b>            |                       |                              |
| Digitonin                                                       | EMD Millipore         | 300410                       |
| Spermidine                                                      | Sigma-Aldrich         | S2501                        |
| Protein A Dynabeads                                             | Invitrogen            | 10001D                       |
| ConA Microbeads                                                 | Bangs Laboratory      | BP531                        |
| Protein A Mnase                                                 | Skene et al. 2018     |                              |
| MNase                                                           | NEB                   | M0247S                       |
| Cas9-NLS                                                        | Berkley Macrolabs     |                              |
| ACK lysing buffer                                               | ThermoFisher          | A1049201                     |
| TRizol                                                          | Invitrogen            | 15596026                     |
| T4 DNA Polymerase                                               | New England Biolabs   | M0203L                       |
| Klenow DNA Polymerase                                           | New England Biolabs   | M0210L                       |
| T4 PNK                                                          | New England Biolabs   | M0201L                       |
| Klenow (3'-5' Exo-)                                             | New England Biolabs   | M0212L                       |
| Quick DNA Ligase                                                | New England Biolabs   | M2200L                       |
| Phusion HF Master Mix                                           | New England Biolabs   | M0531L                       |
| Complete, EDTA-Free PI Cocktail                                 | Roche                 | 11873580001                  |
| <b>Critical Commercial Assays</b>                               |                       |                              |
| GeneArt™ Precision gRNA Synthesis Kit                           | ThermoFisher          | A29377                       |
| Agencourt AMPure XP                                             | Beckman Coulter       | A63880                       |
| RNeasy Plus Micro kit                                           | Qiagen                | 74034                        |
| Nextera DNA Library Preparation Kit                             | Illumina              | FC-121-1030                  |
| Nextera Index Kit                                               | Illumina              | FC-121-1011                  |
| NEBNext CHIP-Seq Library Prep Master Mix Set for Illumina       | NEB                   | E6240L                       |
| EZ nuclei isolation kit                                         | Sigma                 | NUC101-1KT                   |
| Low Bind DNA Tubes                                              | Ambion                | AM12450                      |
| <b>Deposited Data</b>                                           |                       |                              |
| Raw and Analyzed Data                                           | GSE150384             |                              |
| <b>Experimental Models: Cell Lines</b>                          |                       |                              |
| Lig4 <sup>-/-</sup> FokI-ZFN Abl Cell                           | Lee et al. 2013       | Lig4 <sup>-/-</sup> FokI-ZFN |
| Lig4 <sup>-/-</sup> Abl Cells                                   | Helmink et al 2011    | Lig4 <sup>-/-</sup>          |
| Rag2 <sup>-/-</sup> Rag1 <sup>-/-</sup> Abl pro lymphocyte line | Ji Y et al. 2010      | 63-12                        |
| P5424 cells pre lymphocyte line                                 | Mombaerts et al. 1995 | P5424                        |
| <b>Experimental Models: Organisms/Strains</b>                   |                       |                              |



|                                   |                                 |                                                                                                                           |
|-----------------------------------|---------------------------------|---------------------------------------------------------------------------------------------------------------------------|
| Artemis -/- Bcl2Tg mice           | Bednarski et al., 2012          |                                                                                                                           |
| Rag-/- Bcl2-Tg mice               | Bednarski et al., 2012          |                                                                                                                           |
| Rag-/- Mice                       | JAX Lab                         | 002216 - B6.129S7-Rag1 <sup>tm1Mom</sup> /J                                                                               |
| <b>Oligonucleotides</b>           |                                 |                                                                                                                           |
| RNP-Fam49b genomic target         | GATGTACAGGGTAACGGCGA            | mm9 chr15:63829296-63829978                                                                                               |
| RNP-MYC Pro genomic target        | GTGTGCAGAGCCGCGCTCCG            | mm9 chr15:61816821-61817283                                                                                               |
| RNP-MYC SE genomic target         | GGATGCCTCTCACTGAGTCA            | mm9 chr15:63,510,641-63,510,773                                                                                           |
| RNP-MYC CTCF motif genomic target | GTGGTCTCTGTGGCCAGTAG            | mm9 chr15:61814727-61815220                                                                                               |
| RNP-FAM84b genomic target         | GCTCGCCACGCACCTGCACC            | mm9 chr15:60,654,471-60,654,943                                                                                           |
| RNP-eBeta 5' genomic target       | ACTGTCACGGTGATAGCTAG            | mm9 chr6:41504605-41504606                                                                                                |
| RNP-eBeta 3' genomic target       | AGTGGGAAGAGCGGTGATGT            | mm9 chr6:41504799-41504800                                                                                                |
| RNP-MYC CTCF 5' genomic target    | AGCGTTGCGAAGCCAACGA             | mm9 chr15:61815048-61815150                                                                                               |
| RNP-Vb30 genomic target           | GTAGAATGTTAGGCAGGCAT            | mm9 chr6:41166002-41166061                                                                                                |
| RNP-Agk genomic target            | AGAAAGTAATTAATGGCTA             | mm9 chr6:40275167-40275304                                                                                                |
| RNP-eBeta genomic target          | GATGTAAGATAGTTTAGATG            | mm9 chr6:41504684-41504685                                                                                                |
| <b>Software and Algorithms</b>    |                                 |                                                                                                                           |
| Bowtie2                           | Langmead and Salzberg, 2012     | <a href="http://bowtie-bio.sourceforge.net/bowtie2/index.shtml">http://bowtie-bio.sourceforge.net/bowtie2/index.shtml</a> |
| Samtools                          | Li et al., 2009                 | <a href="http://samtools.sourceforge.net/">http://samtools.sourceforge.net/</a>                                           |
| Novoalign                         | Hercus et al, 2012              | <a href="http://www.novocraft.com">www.novocraft.com</a>                                                                  |
| Picard                            | MIT open license                | <a href="https://broadinstitute.github.io/picard/">https://broadinstitute.github.io/picard/</a>                           |
| MACs2                             | Zhang Y et al, 2008             | <a href="https://github.com/taoliu/MACS">https://github.com/taoliu/MACS</a>                                               |
| DeepTools                         |                                 | <a href="http://www.bionductor.org">http://www.bionductor.org</a>                                                         |
| BEDTools                          | Quinlan A.R. and Hall I.M, 2010 | <a href="http://bedtools.readthedocs.io">bedtools.readthedocs.io</a>                                                      |
| Microsoft Office                  |                                 |                                                                                                                           |
| ggplot2                           | Wickham H., 2016                | <a href="http://ggplot2.tidyverse.org/">http://ggplot2.tidyverse.org/</a>                                                 |
| UCSC Genome Browser               | Karolchik et al, 2003           | <a href="https://genome.ucsc.edu/">https://genome.ucsc.edu/</a>                                                           |
| HicCompare                        | Stansfield et al, 2018          | <a href="http://www.bionductor.org">http://www.bionductor.org</a>                                                         |
